# Supplementary material
Source: PubMed Central journal article supplement (PMC6692137)
Supplement: NIHMS1043542-supplement-table_1.pdf [file NIHMS1043542-supplement-table_1.pdf]

In the format provided by the authors and unedited.

# Methods to study RNA–protein interactions

Muthukumar Ramanathan<sup>1,3</sup>, Douglas F. Porter<sup>1,3</sup> and Paul A. Khavari<sup>1,2\*</sup> 

---

<sup>1</sup>Program in Epithelial Biology, Stanford University School of Medicine, Stanford, CA, USA. <sup>2</sup>Veterans Affairs Palo Alto Healthcare System, Palo Alto, CA, USA. <sup>3</sup>These authors contributed equally: Muthukumar Ramanathan, Douglas F. Porter. \*e-mail: [khavari@stanford.edu](mailto:khavari@stanford.edu)

**Supplementary Table 1. RNA library preparation steps**

| Method                     | Library preparation                                                      | References |
|----------------------------|--------------------------------------------------------------------------|------------|
| <b>HITS-CLIP /PAR-CLIP</b> | Phosphatase› L3› kinase› gel› ppt› L5› RT› PCR                           | 59,62      |
| <b>Variant CLIP 1</b>      | Phosphatase› L3› kinase› L5› gel› ppt› RT› PCR                           | 64,73      |
| <b>Variant CLIP 2</b>      | Phosphatase› kinase› L5› L3› gel› ppt› RT› PCR                           | 71,72      |
| <b>iCLIP</b>               | Phosphatase› L3› kinase(P32)› gel› ppt› RT› gel› ppt› circ› PCR          | 74         |
| <b>irCLIP</b>              | Phosphatase› L3› gel› ppt› RT› SA(L3-bio)› circ› ppt› PCR                | 76         |
| <b>eCLIP</b>               | Phosphatase› L3› gel› ppt or column› RT› exo› L3(DNA)› PCR               | 75         |
| <b>fCLIP</b>               | Phosphatase› ppt› kinase› ppt› gel› ppt› L3› gel› ppt› L5› RT› PCR       | 27         |
| <b>Monitored eCLIP</b>     | Phosphatase› L3› kinase› L5› gel› SA(L5-bio)› RT› L3(DNA)› SPRI› PCR     | 69         |
| <b>BrdU-CLIP</b>           | Phosphatase› L3› kinase› gel› ppt› RT (with BrdUTP)› IP(BrdU)› circ› PCR | 77         |
| <b>GoldCLIP</b>            | Phosphatase› L3› ppt› RT› gel› ppt› circ› PCR                            | 78         |

**Supplementary Table 1. RNA library preparation steps.** A sample of CLIP-seq protocols, and an outline of their library preparation steps. Manipulations of the protein (such as proteinase K extraction) are not noted, only manipulations of RNA and cDNA. L3: 3' adapter ligation to RNA. L3(DNA): 3' adapter ligation to DNA. L5: 5' adapter ligation. Phosphatase: removal of 3' phosphate. Kinase: addition of 5' phosphate. RT: reverse transcription. Gel: any protein or RNA gel, which may or may not include a transfer to a membrane. Ppt: precipitation. SA: Streptavidin pull-down of the indicated biotinylated molecule. Circ: circularization of DNA by a ligase. SPRI: SPRI beads clean-up. IP(BrdU): immunopurification of BrdU. Exo: exonuclease treatment.
